# Supplementary material for: Eye movements reveal spatiotemporal dynamics of visually-informed planning in navigation
Source: eLife journal article supplement (doi:10.7554/elife.73097), 2022-05-03

Backward sweeps

**A**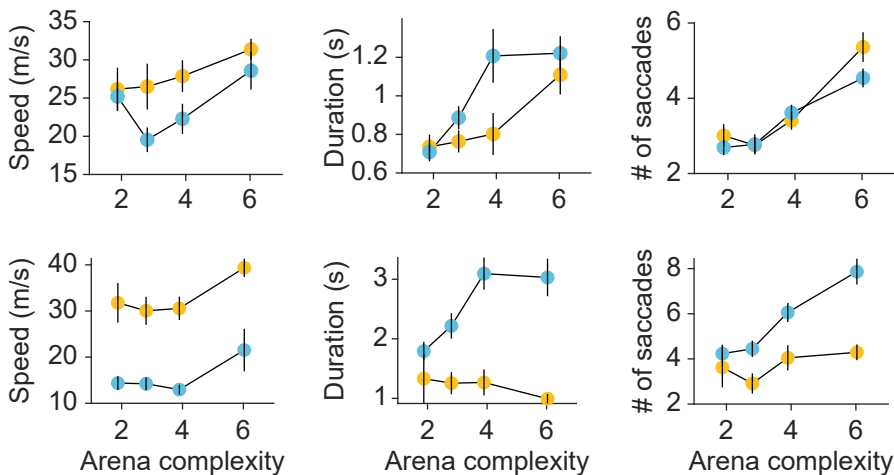

Backward

**B**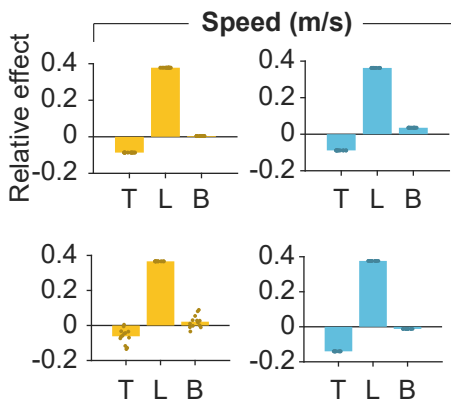

Forward

**C**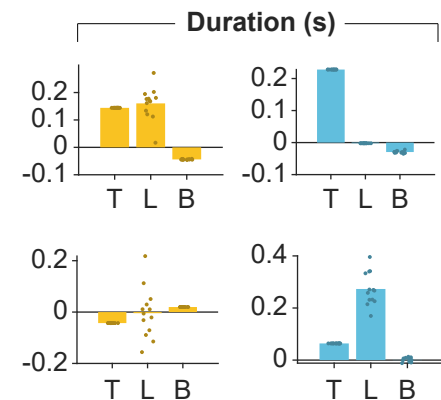

Backward

**D**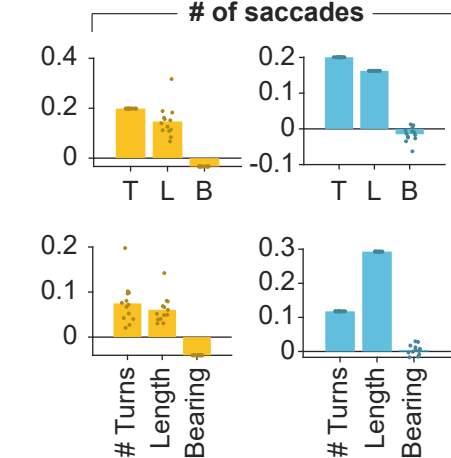

Forward

**F**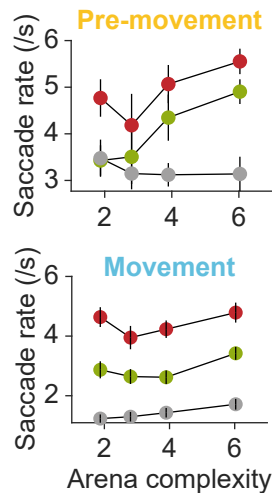

Backward sweeps  
Forward sweeps  
Not sweeping

**E**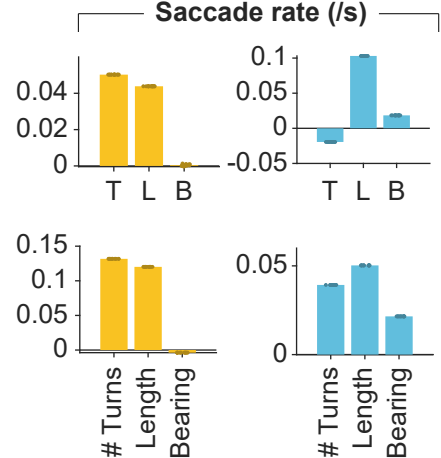

Supplement: supp [file elife-73097-supp-v1.zip]
