# Supplementary figures and images for: Eye movements reveal spatiotemporal dynamics of visually-informed planning in navigation
Source: eLife journal article supplement (doi:10.7554/elife.73097), 2022-05-03

**A**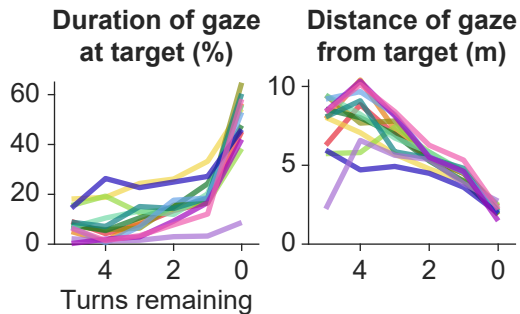**B**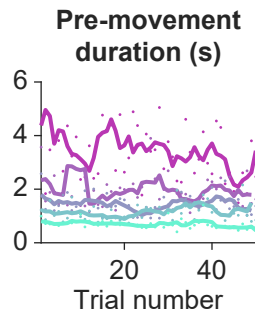**C**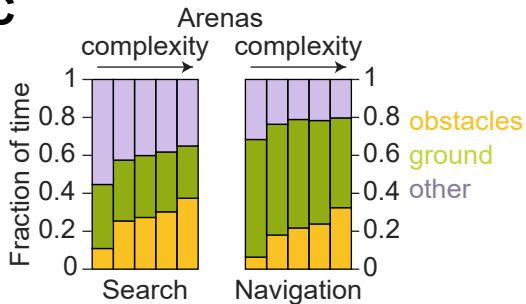**D**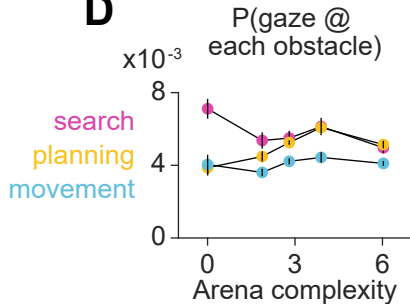

Supplement: supp [file elife-73097-supp-v1.zip]

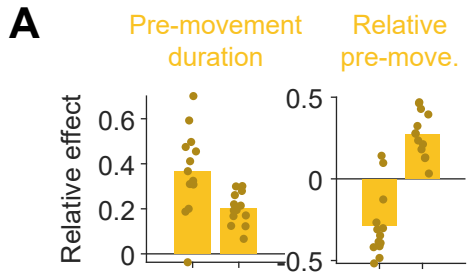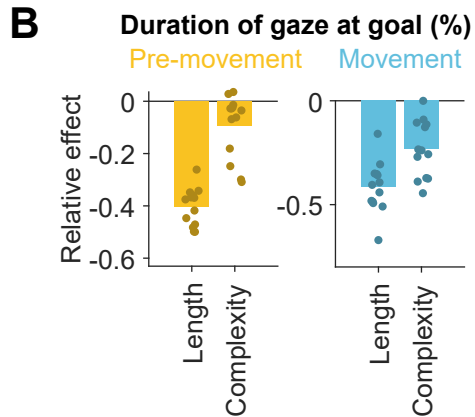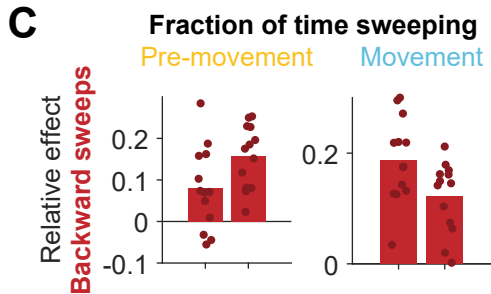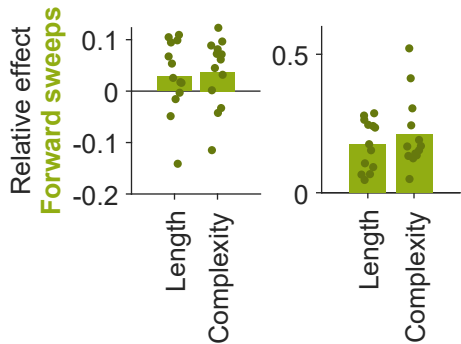

Supplement: supp [file elife-73097-supp-v1.zip]

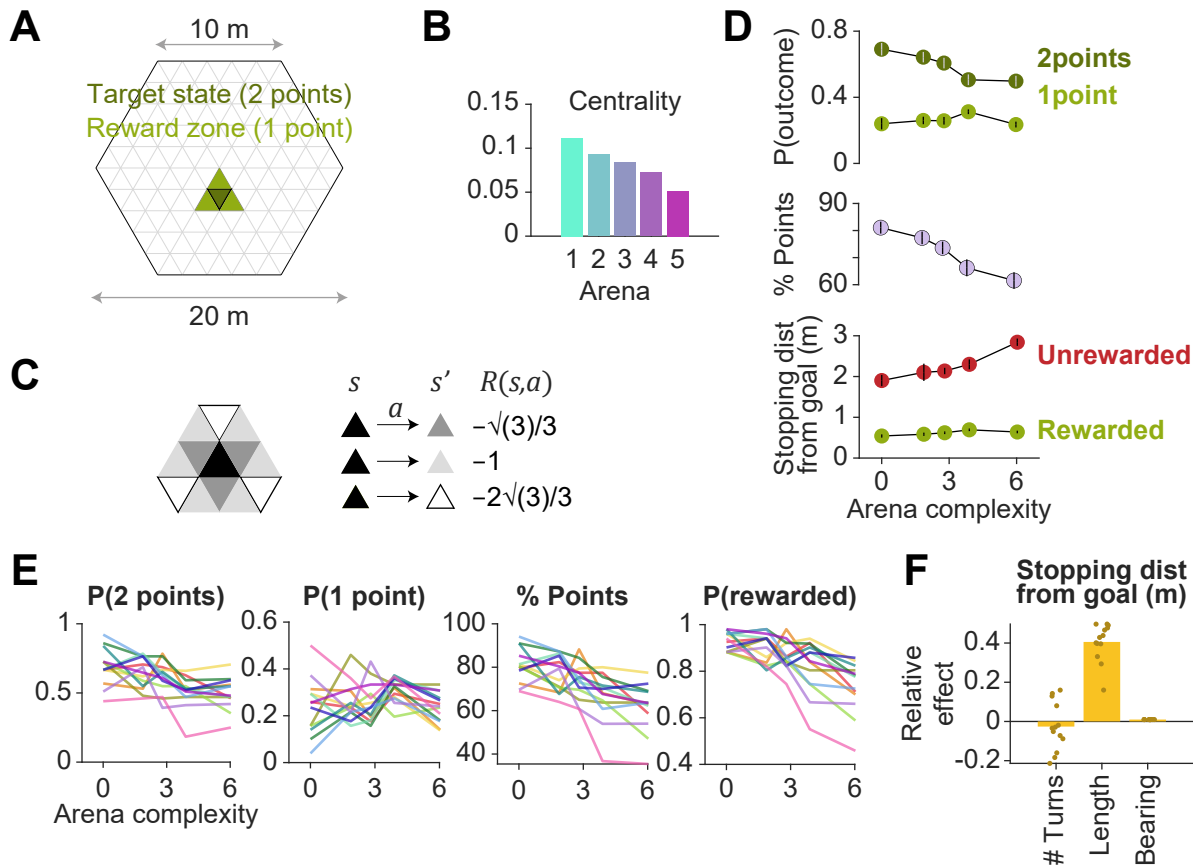

Supplement: supp [file elife-73097-supp-v1.zip]

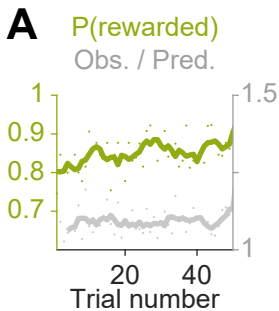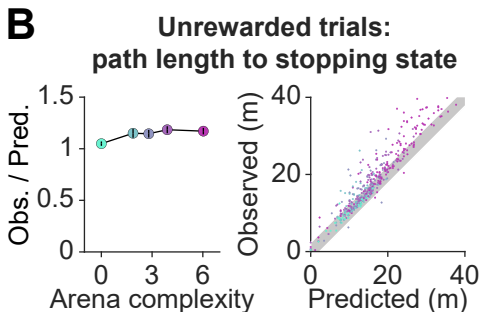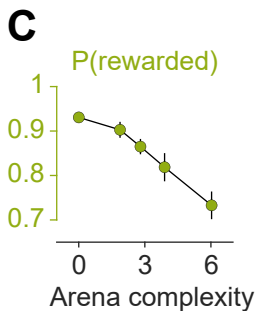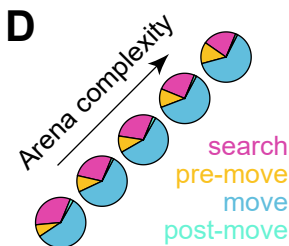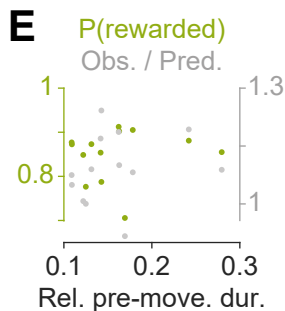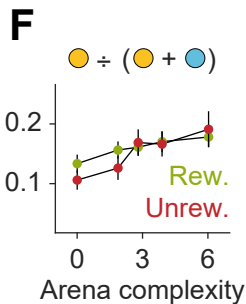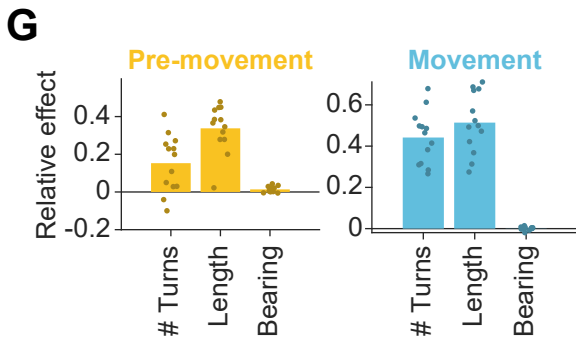

Supplement: supp [file elife-73097-supp-v1.zip]

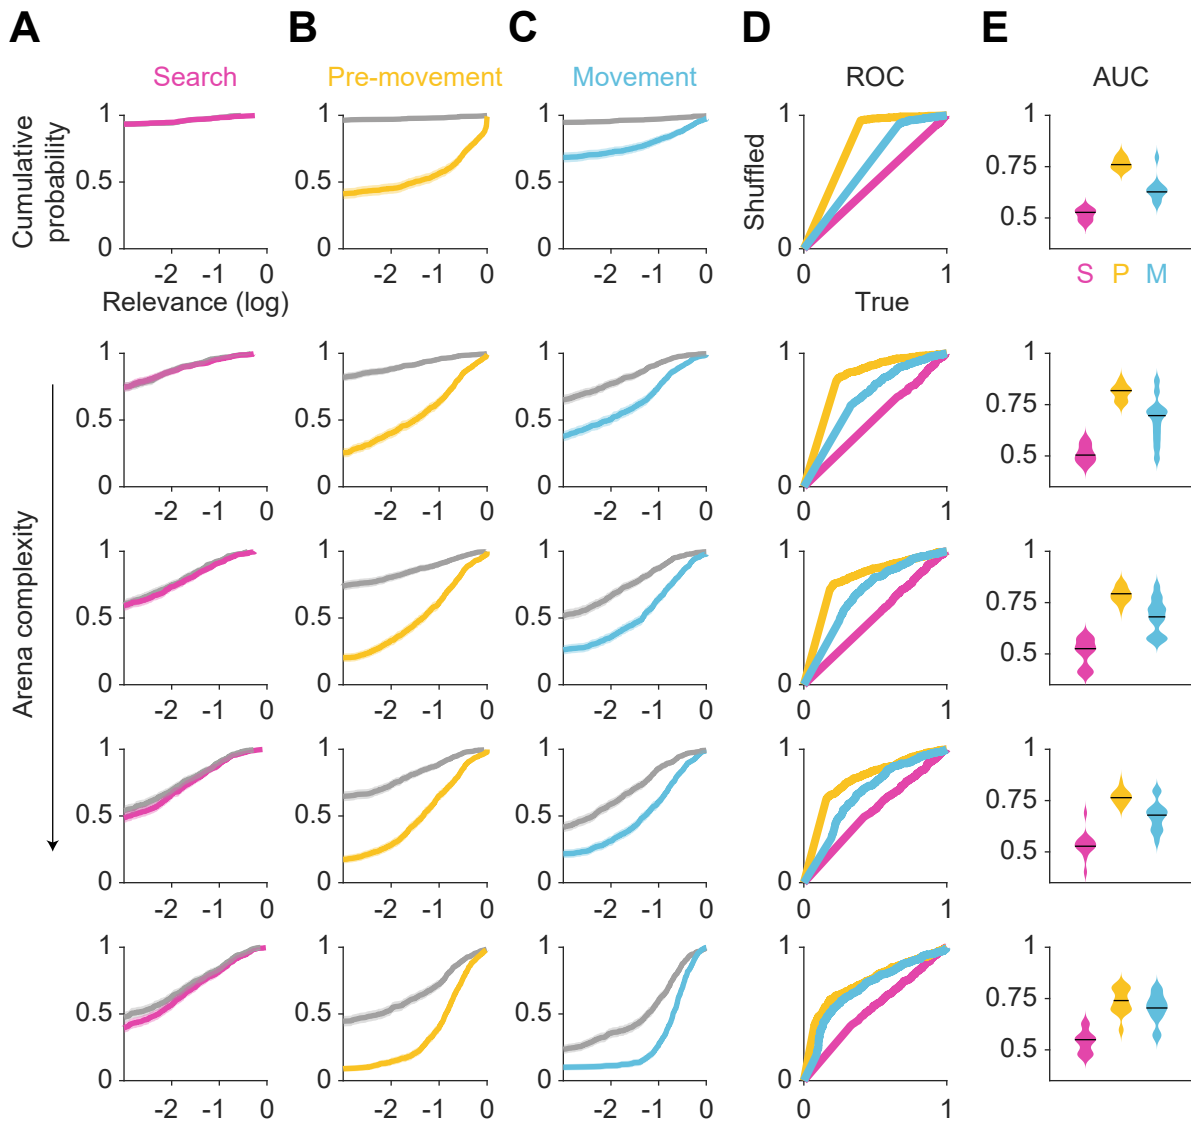

Supplement: supp [file elife-73097-supp-v1.zip]

**A**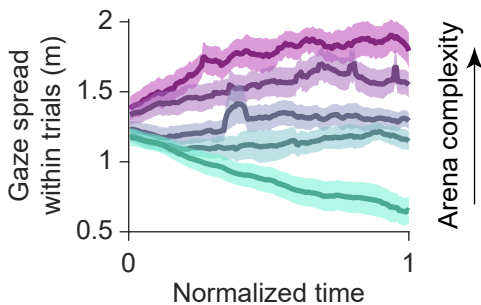**B**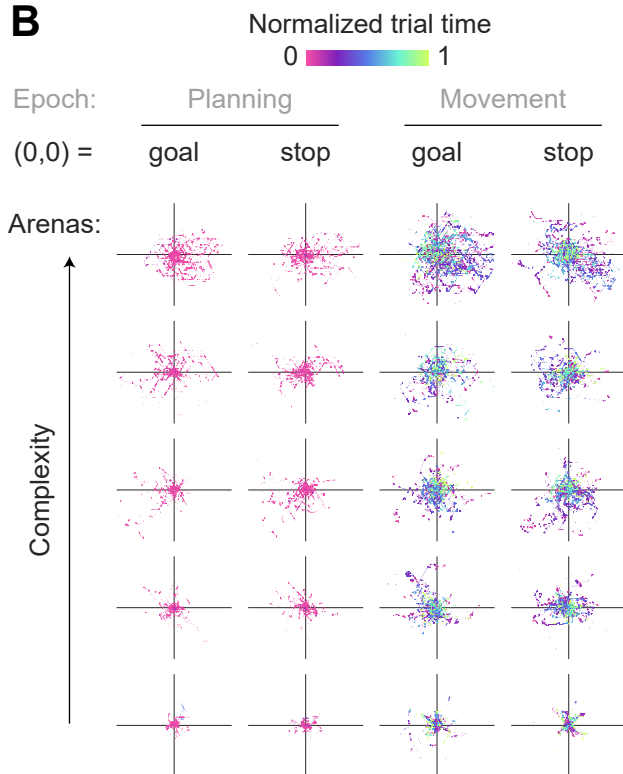

Supplement: supp [file elife-73097-supp-v1.zip]

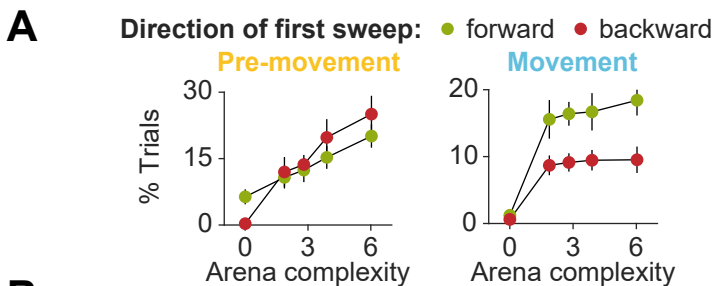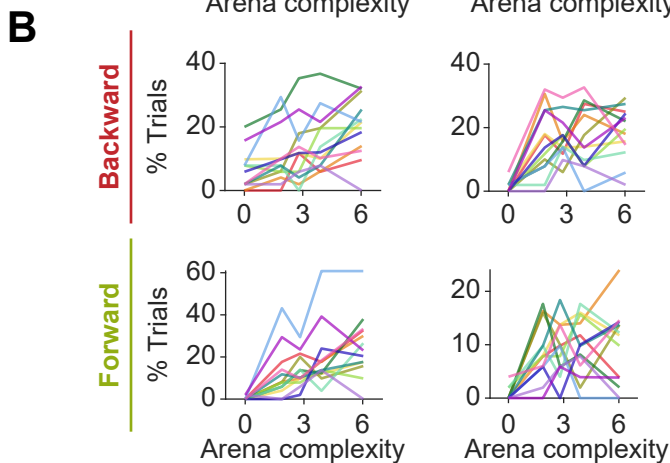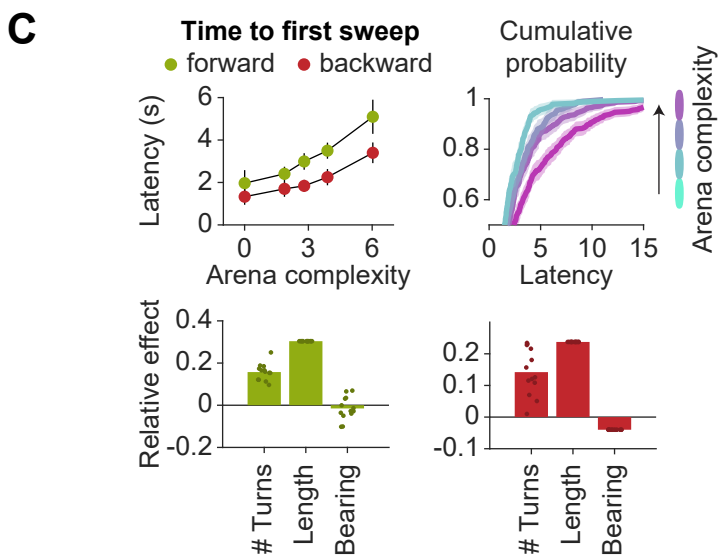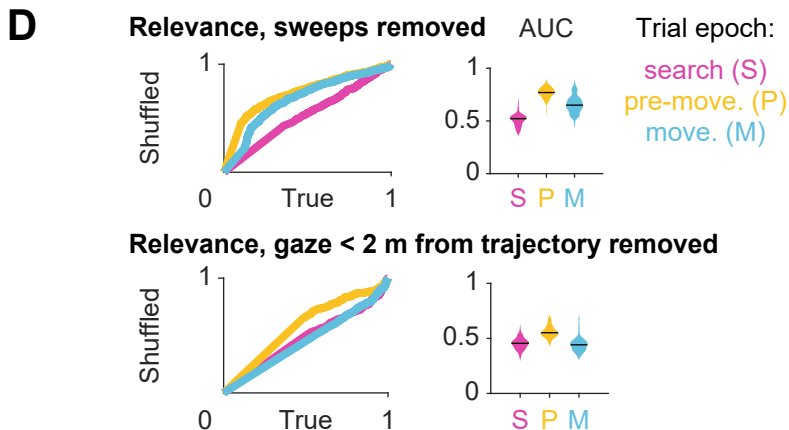

Supplement: supp [file elife-73097-supp-v1.zip]
